# Archerfish number discrimination

1  
2  
3 Davide Potrich<sup>1</sup>, Mirko Zanon<sup>1</sup>, Giorgio Vallortigara<sup>1</sup>  
4

5 <sup>1</sup> Center for Mind/Brain Sciences, University of Trento, Rovereto, Italy  
6

7 *Corresponding authors:*

8  
9 Davide Potrich, Giorgio Vallortigara  
10 Piazza Manifattura, 1 38068 Rovereto

11  
12 +39 0464808736

13 [davide.potrich@unitn.it](mailto:davide.potrich@unitn.it); [giorgio.vallortigara@unitn.it](mailto:giorgio.vallortigara@unitn.it)  
14

15 *Orcid IDs:*

16 Davide Potrich: 0000-0003-0928-628X

17 Mirko Zanon: 0000-0003-4062-1496

18 Giorgio Vallortigara: 0000-0001-8192-9062  
19

20 **ABSTRACT**

21 Debates have arisen as to whether non-human animals actually can learn abstract non-  
22 symbolic numerosness or whether they always rely on some continuous physical  
23 aspect of the stimuli covarying with number. Here we investigated archerfish (*Toxotes*  
24 *jaculatrix*) non-symbolic numerical discrimination with accurate control for co-varying  
25 continuous physical stimulus attributes. Archerfish were trained to select one of two  
26 groups of black dots (Exp. 1: 3 vs. 6 elements; Exp. 2: 2 vs. 3 elements); these were  
27 controlled for several combinations of physical variables (elements' size, overall area,  
28 overall perimeter, density and sparsity), ensuring that only numerical information was  
29 available. Generalization tests with novel numerical comparisons (2 vs. 3, 5 vs. 8 and 6  
30 vs. 9 in Exp. 1; 3 vs. 4, 3 vs. 6 in Exp. 2) revealed choice for the largest or smallest  
31 numerical group according to the relative number that was rewarded at training. None of  
32 the continuous physical variables, including spatial frequency, were affecting archerfish  
33 performance. Results provide evidence of the spontaneous use of abstract relative  
34 numerical information in archerfish for both small and large numbers.

35

36 **KEYWORDS:** number, numerical cognition, number discrimination, numerical rule,  
37 number sense, archerfish.

38

## 39 INTRODUCTION

40 Non-symbolic numerical estimation is an important and well-studied cognitive ability that  
41 allows humans and other animals to interact successfully with their surroundings. The  
42 development of a “sense of number” is associated with fundamental biological needs  
43 that in many ecological contexts allow animals to estimate how many companions or  
44 enemies are around, or how much food is present in different patches - all important  
45 information to maximize fitness and reproductive success in the wild [1].

46 Typically, in order to assess numerical abilities animals are requested to  
47 discriminate between sets of visual stimuli differing in numerosity (review in [2]). This  
48 can be done using spontaneous attractive natural stimuli such as food or social  
49 companion, taking advantage of the animals’ natural and spontaneous tendency in  
50 some ecological contexts to “go for more”. Alternatively, operant conditioning  
51 procedures can be used that associate a particular set of stimuli with a reward.  
52 Extensive evidence supports the use of numerical information in non-human primates  
53 (e.g., [3–7]), as well as in other mammals (e.g., [8–13]), in birds (e.g., [14–19]), in  
54 amphibians (e.g., [20,21]), in reptiles (e.g., [22,23]), in fish (e.g., [24–26]) and in  
55 arthropods (e.g., [27–30]) (see for general reviews in vertebrates [1,31,32]).

56 Numerical discrimination seems to be supported by an “Approximate Number  
57 System” (ANS, [33,34]), which discriminative accuracy is ratio-dependent in accordance  
58 to Weber’s law (as the ratio between two numerosity increases, the discrimination gets  
59 more difficult). Besides the ANS, an attentional working memory-based system has  
60 been claimed for by some authors as providing precise representation of small numbers

61 (up to 3-4), the so-called “Object Tracking System” (OTS; [35]), though its generality for  
62 non-human animals is debated (discussion in [31,36]).

63 Studies investigating the neural basis of number representation revealed  
64 selectivity of response of neurons in some areas of the brain such as the parietal and  
65 prefrontal cortex in humans [37,38] and in monkeys [39,40], the nidopallium  
66 caudolaterale in crows [15,41] and the most caudal dorsal-central part of the pallium in  
67 zebrafish [42,43], suggesting that common selective pressures led to convergent  
68 evolution of numerical representation in different species [44,45].

69 However, one issue in all these experiments is that animals are dealing with sets  
70 of physical elements, and thus numerical information is intrinsically melted with other  
71 non-numerical properties of the stimulus, such as the area, the density or the spatial  
72 frequency or the elements’ arrangement [46]. Recently, some debates have arisen  
73 concerning whether bees use abstract numerical information or rather rely on sensory  
74 properties of the stimulus for discrimination [47,48].

75 Taking advantage of the fact that we recently developed a sophisticated script for  
76 the automatic generation of visual stimuli that can allow proper randomization and  
77 control of continuous physical variables in number sense experiments [49], we decided  
78 to perform some very precisely controlled experiments to check whether fish do use  
79 number as abstract property.

80 We selected archerfish (*Toxotes jaculatrix*) for our study. These fish are well-  
81 known for their particular hunting strategy, which consists of spitting at preys above the  
82 water surface with a precise jet of water thrown with the mouth. This attacking repertoire  
83 makes it very easy to train them to hit targets using operant conditioning (see e.g., [50]).

84           Still, to date, no studies in archerfish have explicitly investigated abstract numerical  
85 abilities. Leibovich-Raveh et al. [51] and colleagues showed that when archerfish make  
86 magnitude-related decisions, their choice is influenced by the non-numerical variables  
87 that positively correlate with numerosity; for instance, when exposed to two groups of  
88 dots differing in number and continuous physical information, archerfish spontaneously  
89 selected the group containing the larger non-numerical magnitudes and smaller  
90 numerosity, switching to the larger numerical set when positively correlated with all the  
91 non-numerical magnitudes.

92           Related to magnitude discrimination, archerfish also proved to be able to associate  
93 different geometric shapes with different food quantities [52]; this would support the  
94 existence of a system dealing with magnitudes, although a specific role of numerical  
95 information remains unclear.

96           In our study archerfish were trained to select one of two arrays, involving either a  
97 small and a large numerosity (Exp. 1: 3 vs. 6 elements) or small numerosities only (Exp.  
98 2: 2 vs. 3 elements). After reaching a learning criterion, archerfish were tested with  
99 novel numerical comparison (2 vs. 3, 5 vs. 8 and 6 vs. 9 in Exp 1; 3 vs. 4, 3 vs. 6 in Exp  
100 2) to check whether the rule they used in the training phase was based on a relative  
101 judgement (select the “largest” or “smallest” group) or on an absolute judgment (select a  
102 specific number of item). All of the different continuous physical variables such as  
103 radius, total area, total perimeter, convex hull and inter-distance were carefully  
104 controlled for and alternately balanced across trials, ensuring that the animals could not  
105 rely on them to perform their judgment (Figure 1). Furthermore, a statistical analysis  
106 was run for *a posteriori* evaluation of whether any of these variables influence the

107 archerfish responses, confirming that they were not used as a cue for numerical  
108 evaluation.

109

110

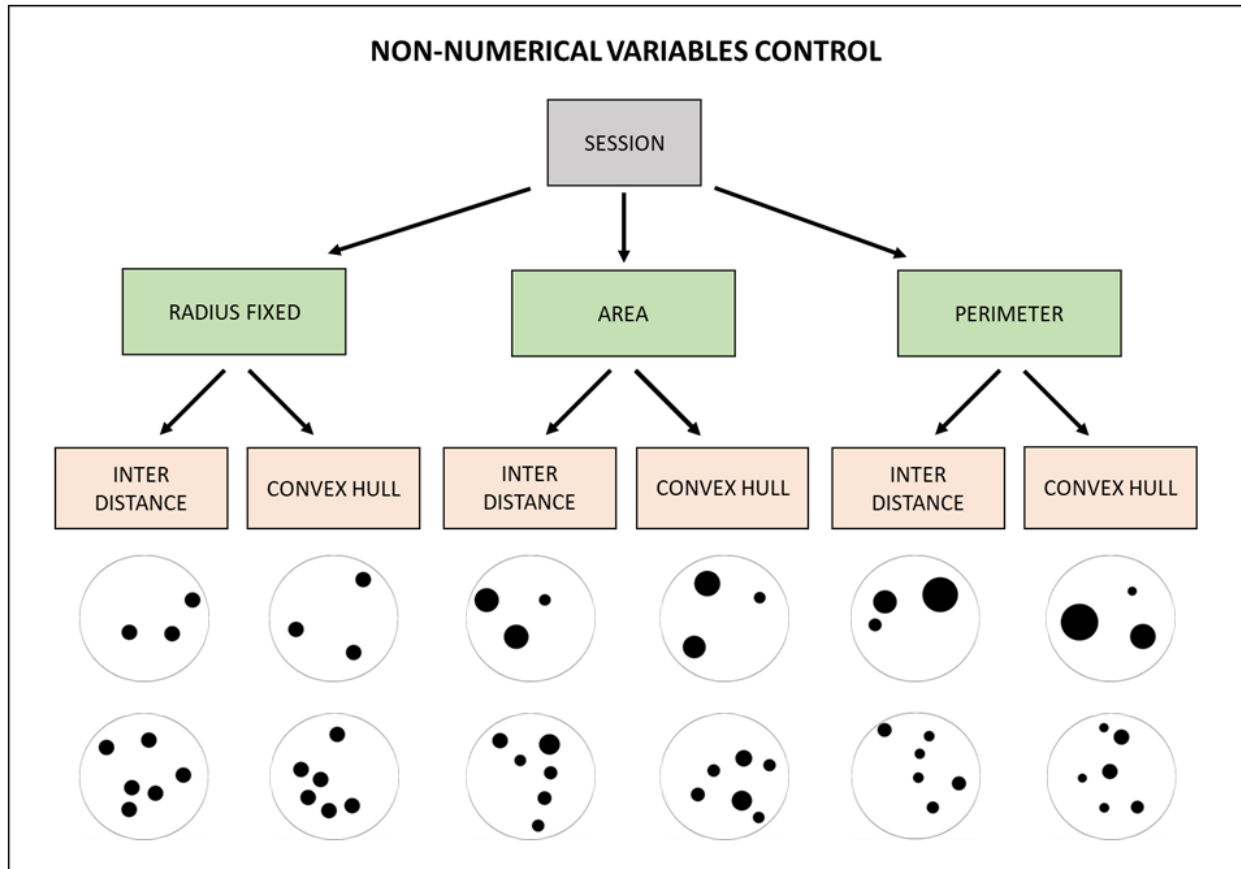

111 **Figure 1.** Schematic representation of the non-numerical physical controls applied to  
112 the stimuli in each session.  
113

114

115

## 116 RESULTS

### 117 *EXPERIMENT 1*

118 Eight archerfish were trained to discriminate between two groups of black dots in a 3 vs.  
119 6 numerical comparison; four fish were trained to select the number 3, while the other  
120 four were rewarded with the number 6. No difference has been found in the number of  
121 trials needed to reach the learning criterion between the group trained with 3 elements  
122 (mean $\pm$ SEM= 451.25 $\pm$ 106.77) and the group trained with 6 elements (mean $\pm$ SEM=  
123 413.25 $\pm$ 73.14) (Independent Samples t-Test:  $t(6)=0.294$ ,  $p=0.779$ ).

124 Once the learning criterion was reached, all the fish performed three different tests.

125 TEST 1: This test was the main discriminator to understand whether at training fish  
126 represented numerosity as relative or absolute. Fish trained to select the smallest  
127 number 3 at training (i.e. the smallest set in the 3 vs. 6) were presented at test with a  
128 novel discrimination 2 vs.3, while fish trained to select the number 6 at training (i.e.,  
129 largest set in the 3 vs. 6) were tested with a 6 vs. 9 condition. The use of “relative”  
130 information (go for the smallest or largest) should lead the fish to choose the novel  
131 numerosity at test, while the use of “absolute” information would reflect in the choice of  
132 the stimulus with the same number of elements as at training.

133 TEST 2: The second test aimed to clarify the role of the incorrect (i.e.,  
134 unrewarded) training stimulus and its relevance for the fish. When fish are trained to  
135 select the numerosity 3, thus avoiding number 6, once presented with the new  
136 comparison 6 vs. 9 (or *vice versa* 2 vs. 3, if trained to select 6), do they choose the  
137 group according to the relative information even if it coincides with the absolute  
138 numerosity to avoid at training?

139 TEST 3: In the last test, fish behaviour was observed in a comparison involving  
140 novel numerosities never experienced during the training, i.e., 5 vs. 8. This allowed  
141 observing whether zebrafish applied a relative representation (go for the “smallest” or  
142 “largest”), or if the choice was at the chance level, since no absolute numerical  
143 information experienced at training was present here.

144 Results at tests for Experiment 1 are reported in Figure 2. Choices for the relative  
145 numerosity were analyzed using a generalized linear mixed model fit by maximum  
146 likelihood (Laplace Approximation), binomial GLMM with a logit link in R. Four fixed  
147 effects (type of Training -3 or 6 dots-; type of Test -2 vs. 3, 5 vs. 8 and 6 vs. 9-; type of  
148 geometrical control -radius fixed, overall area controlled, overall perimeter controlled-;  
149 type of spatial disposition control -inter-distance controlled; convex-hull controlled-) and  
150 one random intercept effect (fish) were considered. Analysis on the random effect  
151 showed not to affect the model and no significant differences were found between  
152 effects of groups, nor group interactions (comparisons between different models  
153 considering various effects and interactions reported always  $p > 0.05$ , suggesting to  
154 adopt the simplest model described by the only choice with no contribution from any  
155 effects). Only a trend for the contribution of the type of geometrical control was  
156 observed, driven by a non-significant difference between the “radius fixed” and “overall  
157 area controlled” conditions (post-hoc non-parametric tests adjusted with Tukey method:  
158  $p = 0.063$ ); within this trend, every single condition was statistically significant by chance  
159 level in the direction of the relative choice (“radius fixed”: probability of success =  
160 71.18%,  $p < 0.001$ ; “overall area controlled”: probability of success = 81.25%,  $p < 0.001$ ;  
161 “overall perimeter controlled”: probability of success = 73.61%,  $p < 0.001$ ).



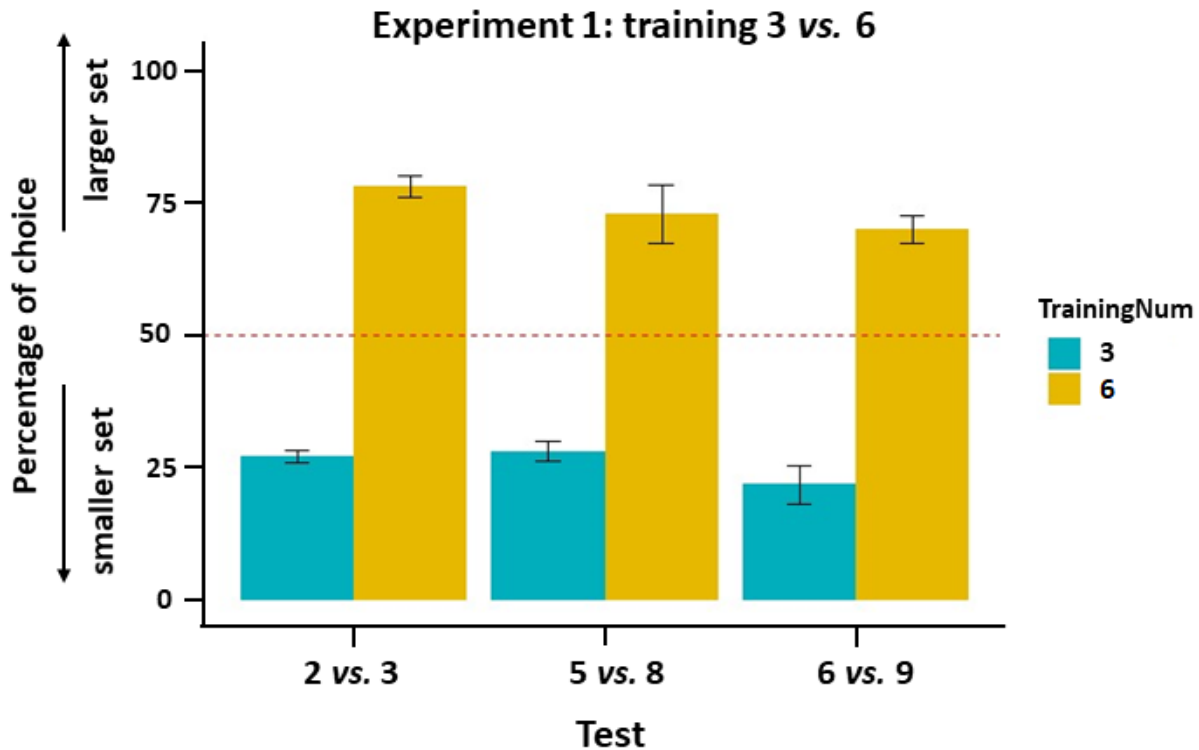

162  
163 **Figure 2.** Percentage of choice for the larger/smaller set (mean  $\pm$  SEM) displayed by  
164 fish in the novel comparison tests for the groups trained to select the smaller (3) or  
165 larger (6) set.  
166

167 Overall, considering the previous discussion, a binomial test shrinking all the data  
168 together was performed to investigate the final findings: fish showed a strong significant  
169 preference for the relative numerosity (probability of success: 74.3%,  $p < 0.001$ ).

170 The result obtained in Experiment 1 showed that archerfish, when trained to select  
171 one of two simultaneously displayed groups of dots with different numerosities (i.e., 3  
172 vs. 6 dots), use a relative numerical rule to perform novel numerical comparisons.  
173 These results confirm findings in other fish species such as angelfish [55] and guppy  
174 [56] but they are different from those obtained in bees which showed instead a  
175 preference for the absolute number [57]. An important difference between fish and bees  
176 studies is related to the numerical comparison used: respectively large numbers ( $> 4$

177 elements) for fish and small numbers ( $\leq 4$  elements) with bees. This might engage  
178 different systems (see Introduction) thus explaining the discrepancy. The training  
179 discrimination used here in Experiment 1 involved two numbers (3 vs. 6) that belong  
180 one to the hypothesized “small” and the other to “large” systems, respectively. This is  
181 different than in previous fish studies which involved only large numerosities; thus, it  
182 remains to be tested how fish would deal when trained with small numerosities only. In  
183 principle, the presence of a large number in the comparison in Exp. 1 may be enough to  
184 lead the archerfish to follow a relative rule. If trained with a numerical discrimination  
185 involving only small numbers, would the animals still use a relative numerosity  
186 judgement or would they turn to absolute judgement? This was tested in Experiment 2.

187

## 188 *EXPERIMENT 2*

189 Four subjects were trained to select the largest number in a 2 vs. 3 comparison (i.e., the  
190 number 3). Fish judgment was then observed in two tests (i.e. 3 vs. 4 and 3 vs. 6)  
191 involving a comparison between the previously trained numerosity (3) and a novel  
192 numerosity (4 or 6).

193 All fish reached the learning criterion, showing an ability to discriminate between  
194 the two numbers (trials to criterion  $\pm$  SEM =  $506.5 \pm 97.8$ ). Results at test are reported in  
195 Figure 3. A GLMM model with three fixed effects (type of test -3 vs. 4 and 3 vs. 6-; type  
196 of geometrical control -radius fixed, overall area controlled, overall perimeter controlled-;  
197 type of spatial disposition control -inter-distance controlled; convex-hull controlled-) and  
198 one random intercept effect (fish) showed no random effect of fish, neither significant  
199 differences between groups or groups' interactions (Chi-Square tests between all

200 different models with different effects and interactions report always  $p > 0.05$ , suggesting  
201 to adopt the simplest model based on the only fish choice -for the relative or absolute  
202 number- and no effects of controls).

203 An Exact binomial test considering a merge of the data showed a highly  
204 significant preference for the relative number (probability of success: 69.79%,  $p <$   
205 0.001).

206 In Experiment 2, archerfish showed to be able to discriminate between two  
207 different numerical groups of dots within the small numerical range. At test, fish  
208 preferred the novel numerosity to the familiar 3 items, in both 3 vs. 4 and 3 vs. 6  
209 comparisons, confirming the use of a relative rather than absolute numerical rule. This  
210 evidence does not match with findings in bees, tested in the same numerical conditions,  
211 suggesting that the spontaneous engagement of relative/absolute rule to extract  
212 numerical information may be guided by different ecological pressures experienced by  
213 different species in their phylogenetic history. The spontaneous use of relative rules  
214 suggests that among fish, it is more important to learn a general rule that is applicable  
215 to novel comparisons. It cannot be excluded that this strategy is adopted because it  
216 could be less demanding as to memory load than an absolute judgement strategy.

217

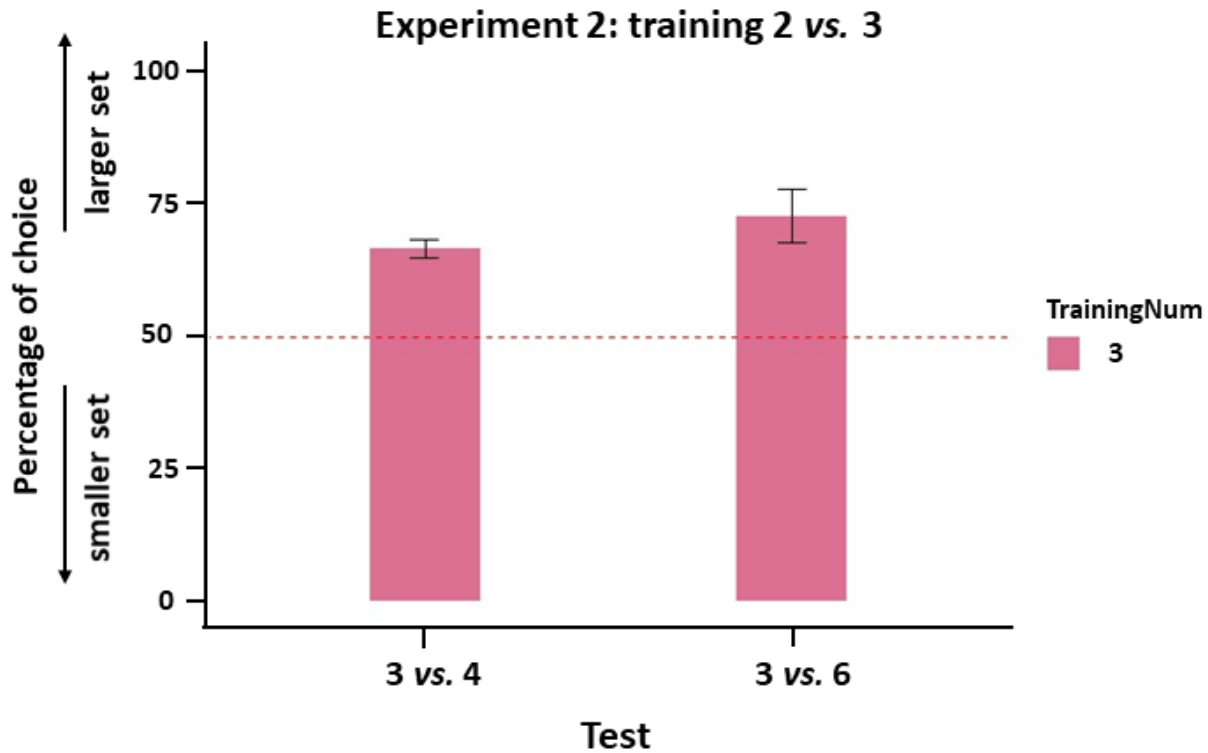

218  
219 **Figure 3.** Percentage of choice for the larger/smaller set (mean  $\pm$  SEM) displayed by  
220 fish in the novel comparison tests for the group trained to select the larger (3) set.  
221

222 Considering the results of Experiment 2 and Experiment 1, it is apparent that  
223 archerfish can easily discriminate between small and large numerosity using the same  
224 rules, providing evidence in favour of a unique system underlying numerical  
225 discrimination as found in other fish species [26,58].

226

### 227 *NUMEROSITY AND SPATIAL FREQUENCY*

228 The stimuli used in our Experiments were visual collections of black dots differing in  
229 numerosity. As described in the method section, for each numerical comparison, the  
230 physical properties of each array were equalized for the geometry (radius, area and  
231 perimeter) and spatial disposition (inter-distance (density) and convex-hull; see Figure

232 1). Since we are dealing with images, each figure could also be described in terms of  
233 spatial frequency. Spatial frequency can be thought of as the number of repeating  
234 elements in a pattern per unit distance, and it is mathematically described by the Fourier  
235 transform theory. No control was applied to the spatial frequency of our stimuli. Thus, in  
236 order to check whether spatial frequency could influence archerfish choice, we  
237 calculated spatial frequency variation across all different numerosities and control  
238 conditions (see Methods section). Within each numerical test comparison, different  
239 spatial frequencies were found (see Figure 4). The different constraints applied to the  
240 stimuli (control of the area, perimeter or elements radius) showed to influence differently  
241 the spatial frequency between the two numerosities. In detail, when the elements' radius  
242 was fixed between the two numerical arrays, the total power of the spatial frequency  
243 was higher in the smaller group than in the larger one, while the opposite was found in  
244 the groups in which the overall perimeter was balanced (total power higher in the more  
245 numerous group). Interestingly, this trend was maintained in all the numerical  
246 comparisons used, irrespective of the number of elements to be compared.

247 To investigate the influence of spatial frequency in the numerical task, we  
248 analyzed whether a correlation between the performance accuracy and the spatial  
249 frequency was apparent, for all possible control configurations (see Methods section).  
250 Results are reported in Figure 4, showing no correlations between any comparison (test  
251 2 vs. 3:  $r(4) = -0.17$ ,  $p = 0.83$ ; test 3 vs. 4:  $r(4) = 0.15$ ,  $p = 0.77$ ; test 3 vs. 6:  $r(4) = -0.35$ ,  
252  $p = 0.50$ ; test 5 vs. 8:  $r(4) = -0.08$ ,  $p = 0.88$ ; test 6 vs. 9:  $r(4) = -0.42$ ,  $p = 0.41$ ).

253 These data strongly suggest that the spatial frequency was not influencing archerfish  
254 performance in the numerical task.

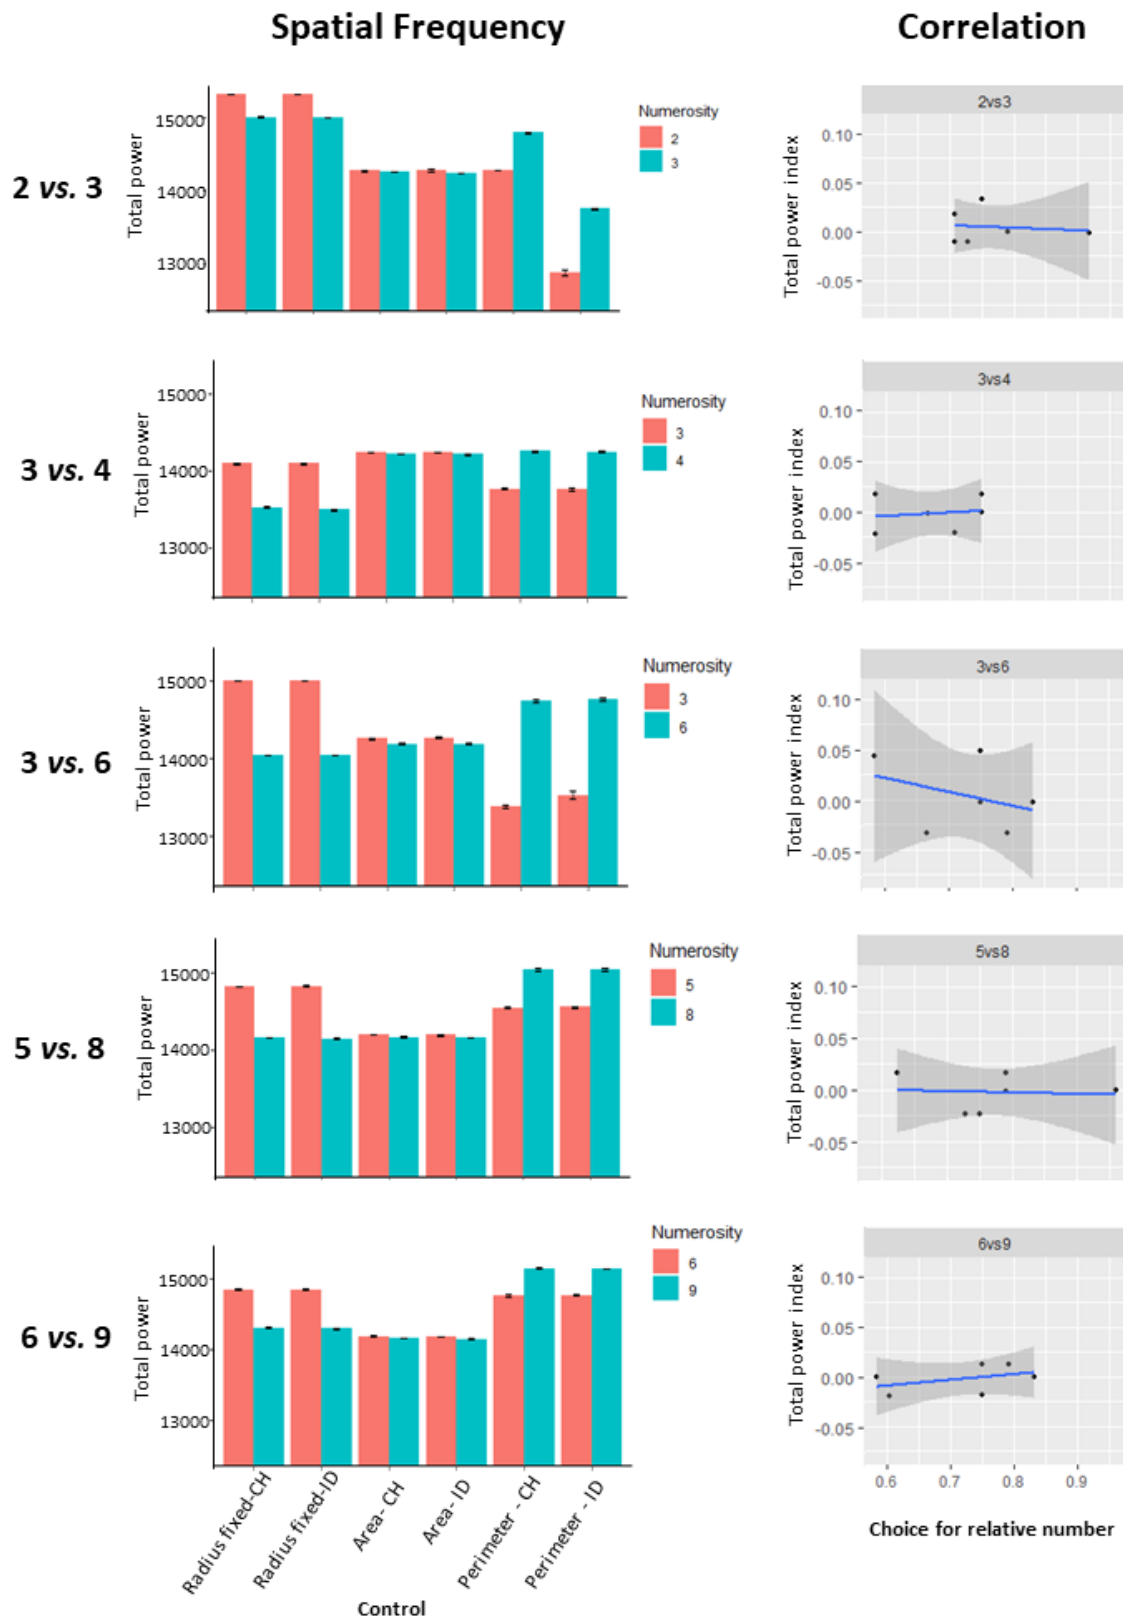

256 **Figure 4.** The histograms (on the left) show the spatial frequency (Total power) for each  
257 numerical comparison among the different control groups (non-numerical variables  
258 control). The different constraints applied to the stimuli (control of the area, perimeter or  
259 elements radius) showed to influence the spatial frequency between the two compared  
260 numerosities. The regression lines (on the right) show the correlation between fish'  
261 performance accuracy (choice for the relative numerosity) and the spatial frequency  
262 (total power index between the two total power values), for all numerical comparisons.  
263

## 264 DISCUSSION

265

266 Overall, our results showed that when trained to select a specific group of elements  
267 between two numerical arrays, archerfish spontaneously generalize at test to novel  
268 numerical comparison according to a relative numerical rule (select the largest/smallest)  
269 rather than an absolute numerical rule (select the specific number of items). These  
270 findings are in agreement with previous results from other fish species and humans  
271 [55,56], while differing with respect to bees [57].

272 Interestingly, archerfish uses a general relative judgement even when trained to  
273 discriminate between numerosities that belong to different systems, namely small and  
274 large numerosities (for a review see [61]). In Experiment 1, archerfish were trained with  
275 a 3 vs. 6 contrast and then observed in test conditions with a 2 vs. 3, 6 vs. 9 and 5 vs. 8  
276 comparison. In all the tests, archerfish showed to spontaneously use a general relative  
277 rule. In Experiment 2, subjects' performance was observed in a numerical discrimination  
278 involving at training only small numerosities (i.e., 2 vs. 3). Once again, at test, fish  
279 followed the relative rule, selecting the largest group in the test comparisons 3 vs. 4 and  
280 3 vs. 6, thus ignoring the absolute number of elements (3).

281 Taken together, our results support the hypothesis of a unique system for  
282 representing numerosities in archerfish, working both for small and large numbers,  
283 obeying the ANS. Evidence from other fish species supports this claim [26,58].

284 The reason for which archerfish primarily rely on the relative information of  
285 numerical groups may have ecological reasons, being more adaptive in a natural  
286 environment that constantly require numerical/quantity judgement. Selecting the largest  
287 social group of companions or the largest food patch are easy rules that can be more  
288 efficient than using an absolute rule. Moreover, the use of relative information may be  
289 less cognitively expensive (in terms of memory load) than the absolute one, since it  
290 does not require storing the information about the precise number of elements: the  
291 discrimination could work on a simple relative comparison between numerosities,  
292 guided by the numerical ratio between the two. Nevertheless, the engagement of  
293 relative rules requires a good level of abstraction and the creation of a general rule to be  
294 applied to [62].

295 In fish, the use of an absolute rule may not be as convenient as the relative one,  
296 given that in most ecological contests there is not a specific optimal amount of food,  
297 partners or companions. However, this seems not to be the case for species such as  
298 bees, which showed instead a spontaneous use of absolute numerical information,  
299 suggesting that this rule may be more informative and useful in their ecological  
300 environment. Similar evidence has been found in spiders, that, in a natural predatory  
301 strategy context, settle their attack based on the specific number of conspecifics at the  
302 nest [29].



303 Note, however, that the spontaneous use of a relative or absolute rule does not  
304 imply that animals are unable to use both. Vertebrates can be trained to learn a specific  
305 number of items in a set if forced to do it [6,56,63,64]. Similarly, bees can be trained to  
306 the numerical concepts of “greater than” or “smaller than” [47]. The spontaneous  
307 engagement of one of the two criteria is therefore justified probably by a combination of  
308 natural constraints and/or less cognitive demand motivations that better fit for the  
309 individuals' fitness in their particular niches of adaptation.

310 Lastly, with respect to the main question of our paper, the results showed that  
311 archerfish are capable of abstract numerical discrimination, not influenced by other  
312 continuous physical variables. We tested archerfish with numerical arrays well  
313 controlled for all the possible non-numerical variables (e.g., total area, perimeter, inter-  
314 distance (density), convex hull), thus ensuring that the discrimination made by the  
315 animals was based on purely numerical information. The results of the statistical  
316 analyses showed no influence whatsoever of the different control conditions on the fish  
317 choices. Moreover, we showed that even the different spatial frequencies of the stimuli  
318 were not influential on archerfish performance. The total power of the spatial frequency  
319 has been described in the literature to positively increase with numerosity [48]; however,  
320 in our stimuli, the different geometrical constraints showed that it can be reversed as  
321 well. Moreover, elements area and perimeter seem to play a crucial role in the  
322 distribution of the spatial frequencies' energy with respect to the elements disposition  
323 (inter-distance and sparsity). All our analyses suggested that the amplitude component  
324 of the spatial frequency was not influencing archerfish numerical evaluation during our  
325 experiments.

326 Note, however, that in all studies carried out so far (including our own analysis),  
327 the focus was on the amplitude of the spatial frequency as the main component, which  
328 provides information on the alternation rate of different elements in the image. It is likely  
329 that a more specific role on computation of numerosity is played by the spatial  
330 frequency phase component (related to elements' spatial coherence and  
331 distribution) which directly relates to figure-ground aggregation and unity formation.

332 In conclusion, our results provide clear evidence that under conditions of strict  
333 control of continuous physical variables archerfish can encode an abstract concept of  
334 number to support relative numerical judgement for both small and large numerosities.

## 335 MATERIALS AND METHODS

### 336 *SUBJECTS AND REARING CONDITIONS*

337 Sixteen adult archerfish, *Toxotes jaculatrix* (fish size ranged between 8 and 10 cm in  
338 length) were provided by a local commercial supplier ("Acquario G di Segatta Stefano").  
339 Four animals were excluded because they did not show any consistent motivation in  
340 hitting the screen. A group of fish (N=8) took part in Experiment 1, while a second group  
341 (N=4) took part in Experiment 2. All fish were housed in large aquariums (100 x 40 x 40  
342 cm) in groups of 10 individuals. Prior to the experiment, each archerfish was moved into  
343 individual aquaria (40 x 30 x 50 cm) filled with freshwater maintained at 25°C and  
344 enriched with gravel and a shelter. Water quality was kept by suitable filters (Sera fil  
345 60). The system was illuminated under a 10:14 light /dark cycle (Sylvania luxline plus  
346 F36W/840 cool white). Fish were fed with food pellets (Hikari cichlid gold baby pellet).

347 **APPARATUS**

348 Both the apparatus and the training method were set up based on previous studies  
349 conducted with archerfish on visual discrimination tasks (i.e., [52,53]). Each  
350 experimental tank consisted of a rectangular aquarium with a monitor screen located  
351 above it (20", DELL 2009Wt), held at 30 cm from the water level (Figure 5a). Each tank  
352 was surrounded by white opaque panels to ensure that the fish was not distracted by  
353 external cues. Each tank was raised 8 cm off the table thanks to lateral supports,  
354 allowing the positioning of a video camera under the centre of the pavement's tank to  
355 record a bottom view of the fish and the screen (see video example in the  
356 supplementary materials).

357

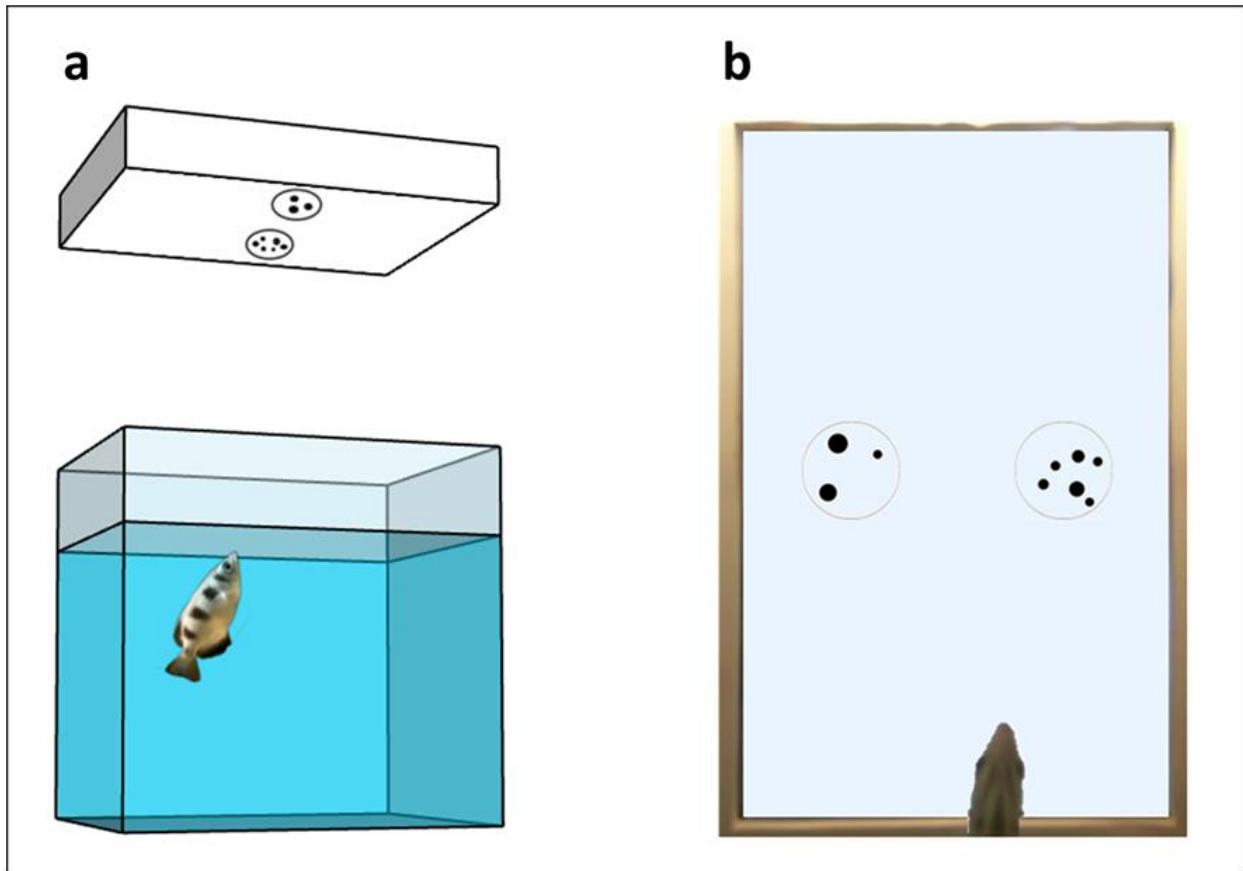

358

359 **Figure 5.** a) Schematic representation of the experimental setup; b) Bottom view of  
360 the tank from the camera placed below the tank's pavement.  
361

## 362 *STIMULI*

363 The stimuli presented in the training phase consisted of groups of black dots confined  
364 into a black outline circle (6 cm diameter). The dots size was ranging between 3 and 12  
365 mm, and the visual angle was in the range  $0.43^\circ$  and  $1.72^\circ$ , which has been proven to  
366 be well perceived by archerfish [54]. In every trial, a couple of stimuli was  
367 simultaneously presented in the centre of the screen (horizontally aligned to the shortest  
368 monitor's side, see Figure 5b). All the stimuli were created using the software GeNEsIS  
369 [49], a Matlab program that allows to create numerical collections of stimuli controlled  
370 for several non-numerical magnitudes. Given that it is mathematically impossible to  
371 balance all the non-numerical magnitudes simultaneously in two different numerical  
372 groups, different sets of stimuli were created for each numerosity, controlling for some  
373 visual physical property; all the possible properties were covered across the different  
374 sets during a session (see Figure 1 for a view of all the combinations applied in a  
375 session). Pictures from each set were randomly presented, making the numerical  
376 information the only reliable cue to differentiate the two stimuli across all the various  
377 trials.

## 378 *GENERAL PROCEDURE*

### 379 Pre-training phase

380 Before starting the experiment, fish underwent a pre-training phase in which they were  
381 gradually habituated to spit (hit with a jet of water) at the training stimulus on the screen.  
382 This was accomplished throughout a shaping procedure to facilitate the task. The

383 silhouette of an insect was initially presented, inducing the fish reaction to spit at the  
384 prey; once hit, fish were rewarded with a food pellet. The insect was gradually replaced  
385 by a black dot and finally with the effective training stimulus. Once the fish  
386 accomplished all these stages, the training phase was initiated.

### 387 Training phase

388 Fish were trained to spit at the correct target presented on the monitor above the tank.  
389 The stimuli to discriminate consisted of two groups of dots with different numerosity.  
390 Every trial started with the appearance of a blinking black square (1.6 cm, three blinks  
391 of 100 milliseconds) at the centre of the screen to catch the fish's attention towards the  
392 screen. Then, the two training stimuli were displayed one next to the other (distance 7  
393 cm) on the two sides of the monitor. Only one of the two numerosities was rewarded  
394 with a food pellet when hit, while the choice for the incorrect stimulus caused the stop of  
395 the trial, which in every case, in absence of choice, was stopped after 5 minutes. At the  
396 end of each trial, the screen was cleaned from the water drops and a new trial started.  
397 In the first training session only, a corrective method was applied: the stimuli remained  
398 on the screen until the subject selected the correct target, even if the incorrect stimulus  
399 was hit, allowing the fish to correct its choice.

400 Fish were trained with daily sessions of 48 trials, in which continuous physical  
401 variables were controlled and changed according to the scheme reported in Figure 1,  
402 and the position of the target stimulus on the screen (right-left) was randomized. Fish  
403 generally responded 70% to 100% of the trials. The learning phase was considered  
404 completed when the fish reached a learning criterion of at least 75% of correct choices

405 for two consecutive days (binomial test:  $p < 0.01$ ), allowing the fish to take part in the  
406 test phase.

407

#### 408 Test phase

409 Generally, each test condition consisted of the presentation of a couple of stimuli with a  
410 novel numerical comparison, aiming to see if the numerosity target learned in the  
411 training phase was represented as a relative or an absolute numerical information. Each  
412 test was composed of 24 probe trials not rewarded, divided into three testing days of 8  
413 trials. In each test session, the 8 test trials were shuffled and interspersed with  
414 rewarded recall training trials (32 recall in total), to maintain the fish motivation high  
415 during the whole test duration. The order of the tests was randomized among the fish to  
416 exclude that the performance could be influenced by their order. At the end of each test,  
417 the fish underwent a complete daily session of retraining to further exclude potential  
418 interference among the tests.

#### 419 Statistical analyses and data analysis

420 Data were analyzed using R software (R-4.1.0). In Experiment 1, an independent t-test  
421 was used to compare the number of trials to reach the criterion between the two groups  
422 at training. At test (Exps. 1 and 2), choices for the relative numerosity were analyzed  
423 using a generalized linear mixed model fit by maximum likelihood (Laplace  
424 Approximation), binomial GLMM with a logit link. A binomial test was used to compare  
425 the distribution of the choices for the relative and absolute numerosities.

426 To obtain an estimate of the spatial frequency we adopted an approach already  
427 performed in other studies [48,59,60]: the fast Fourier transform of our images was

428 calculated, a radial average of the signal amplitude in the frequency domain was  
429 performed, and lastly, all the frequency contributions of its power spectrum were  
430 summed up. In this way, a value related to the total energy of each frequency  
431 component inside a given image is obtained.

432 To investigate the influence of spatial frequency in the numerical task, we analyzed  
433 whether a correlation between the performance accuracy (choice for the relative  
434 numerosity) and the spatial frequency (normalized total power difference between the  
435 two compared numerosities) was apparent, for all possible control configurations. To  
436 compare two numerosities we reported a normalized difference (total power index)  
437 between the two total power values (difference between the total power of the biggest  
438 numerosity and the smallest, divided by their sum). All the frequency calculations were  
439 performed with a custom script in Matlab, while the statistical comparisons were  
440 calculated in R. For each of them a Pearson's correlation coefficient was calculated  
441 comparing the choice for the relative numerosity and the normalized difference between  
442 numerosities (as explained above).

443

#### 444 **Ethical regulation**

445 The present research was carried out at the Animal Cognition and Neuroscience  
446 Laboratory (ACN Lab) of the CIMEC (Center for Mind/Brain Sciences), at the University  
447 of Trento (Italy). All husbandry and experimental procedures complied with European  
448 Legislation for the Protection of Animals used for Scientific Purposes (Directive  
449 2010/63/EU) and were approved by the Scientific Committee on Animal Health and  
450 Animal Welfare (Organismo Preposto al Benessere Animale, OPBA) of the University of  
451 Trento and by the Italian Ministry of Health (Protocol n. 932/2020-PR).

#### 452 **Competing interests**

453 We declare we have no competing interests.

#### 454 **Funding**

455 This project has received funding from the European Research Council (ERC) under the  
456 European Union's Horizon 2020 research and innovation program (grant agreement No  
457 833504 SPANUMBRA to G.V.) and Progetti di Rilevante Interesse Nazionale (PRIN  
458 2017 ERC-SH4–A 2017PSRHPZ to G.V.)

#### 459 **Authors' contribution**

460 D.P. and G.V conceived the study. D.P. G.V and M.Z. designed the experiment. D.P.  
461 performed the experiments. All authors interpreted the data and contributed to the  
462 manuscript writing.

463



## 464 BIBLIOGRAPHY

- 465 1. Nieder A. 2020 The Adaptive Value of Numerical Competence. *Trends Ecol. Evol.*  
466 **35**, 605–617. (doi:10.1016/j.tree.2020.02.009)
- 467 2. Agrillo C, Bisazza A. 2014 Spontaneous versus trained numerical abilities. A  
468 comparison between the two main tools to study numerical competence in non-  
469 human animals. *J. Neurosci. Methods* **234**, 82–91.  
470 (doi:10.1016/j.jneumeth.2014.04.027)
- 471 3. Anderson US, Stoinski TS, Marr MJ, Smith AD, Bloomsmith MA, Maple TL. 2005  
472 Relative numerosness judgment and summation in young and old Western  
473 lowland gorillas. *J. Comp. Psychol.* **119**, 285–295. (doi:10.1037/0735-  
474 7036.119.3.285)
- 475 4. Beran MJ, Evans TA, Leighty KA, Harris EH, Rice D. 2008 Summation and  
476 quantity judgments of sequentially presented sets by capuchin monkeys (*Cebus*  
477 *apella*). *Am. J. Primatol.* **70**, 191–194. (doi:10.1002/ajp.20474)
- 478 5. Beran MJ, Beran MM. 2004 Chimpanzees Remember the Results of One-by-One  
479 Addition of Food Items to Sets Over Extended Time Periods. *Psychol. Sci.* **15**,  
480 94–99. (doi:10.1111/j.0963-7214.2004.01502004.x)
- 481 6. Cantlon JF, Brannon EM. 2007 How much does number matter to a monkey  
482 (*Macaca mulatta*)? *J. Exp. Psychol. Anim. Behav. Process.* **33**, 32–41.  
483 (doi:10.1037/0097-7403.33.1.32)
- 484 7. Smith BR, Piel AK, Candland DK. 2003 Numerity of a Socially Housed  
485 Hamadryas Baboon (*Papio hamadryas*) and a Socially Housed Squirrel Monkey  
486 (*Saimiri sciureus*). *J. Comp. Psychol.* **117**, 217–225. (doi:10.1037/0735-  
487 7036.117.2.217)
- 488 8. Abramson JZ, Hernández-Lloreda V, Call J, Colmenares F. 2013 Relative  
489 quantity judgments in the beluga whale (*Delphinapterus leucas*) and the  
490 bottlenose dolphin (*Tursiops truncatus*). *Behav. Processes* **96**, 11–19.  
491 (doi:10.1016/j.beproc.2013.02.006)
- 492 9. Benson-Amram S, Heinen VK, Dryer SL, Holekamp KE. 2011 Numerical  
493 assessment and individual call discrimination by wild spotted hyaenas, *Crocuta*  
494 *crocuta*. *Anim. Behav.* **82**, 743–752. (doi:10.1016/j.anbehav.2011.07.004)
- 495 10. McComb K, Packer C, Pusey A. 1994 Roaring and numerical assessment in  
496 contests between groups of female lions, *Panthera leo*. *Anim. Behav.* **47**, 379–  
497 387. (doi:10.1006/anbe.1994.1052)
- 498 11. Perdue BM, Talbot CF, Stone AM, Beran MJ. 2012 Putting the elephant back in  
499 the herd: Elephant relative quantity judgments match those of other species.

- 500        *Anim. Cogn.* **15**, 955–961. (doi:10.1007/s10071-012-0521-y)
- 501    12.    Vonk J, Beran MJ. 2012 Bears ‘count’ too: Quantity estimation and comparison in  
502        black bears, *Ursus americanus*. *Anim. Behav.* **84**, 231–238.  
503        (doi:10.1016/j.anbehav.2012.05.001)
- 504    13.    West RE, Young RJ. 2002 Do domestic dogs show any evidence of being able to  
505        count? *Anim. Cogn.* **5**, 183–186. (doi:10.1007/s10071-002-0140-0)
- 506    14.    Bogale BA, Aoyama M, Sugita S. 2014 Spontaneous discrimination of food  
507        quantities in the jungle crow, *Corvus macrorhynchos*. *Anim. Behav.* **94**, 73–78.  
508        (doi:10.1016/j.anbehav.2014.05.012)
- 509    15.    Ditz HM, Nieder A. 2016 Numerosity representations in crows obey the Weber-  
510        Fechner law. *Proc. R. Soc. B Biol. Sci.* **283**. (doi:10.1098/rspb.2016.0083)
- 511    16.    Garland A, Low J, Burns KC. 2012 Large quantity discrimination by North Island  
512        robins (*Petroica longipes*). *Anim. Cogn.* **15**, 1129–1140. (doi:10.1007/s10071-  
513        012-0537-3)
- 514    17.    Pepperberg IM. 2006 Grey parrot (*Psittacus erithacus*) numerical abilities:  
515        Addition and further experiments on a zero-like concept. *J. Comp. Psychol.* **120**,  
516        1–11. (doi:10.1037/0735-7036.120.1.1)
- 517    18.    Rugani R, Vallortigara G, Regolin L. 2013 Numerical Abstraction in Young  
518        Domestic Chicks (*Gallus gallus*). *PLoS One* **8**, 4–9.  
519        (doi:10.1371/journal.pone.0065262)
- 520    19.    Scarf D, Colombo M. 2011 Knowledge of the Ordinal Position of List Items in  
521        Pigeons. *J. Exp. Psychol. Anim. Behav. Process.* **37**, 483–487.  
522        (doi:10.1037/a0023695)
- 523    20.    Krusche P, Uller C, Dicke U. 2010 Quantity discrimination in salamanders. *J. Exp.*  
524        *Biol.* **213**, 1822–1828. (doi:10.1242/jeb.039297)
- 525    21.    Stancher G, Rugani R, Regolin L, Vallortigara G. 2015 Numerical discrimination  
526        by frogs (*Bombina orientalis*). *Anim. Cogn.* **18**, 219–229. (doi:10.1007/s10071-  
527        014-0791-7)
- 528    22.    Gazzola A, Vallortigara G, Pellitteri-Rosa D. 2018 Continuous and discrete  
529        quantity discrimination in tortoises. *Biol. Lett.* **14**, 1–4.  
530        (doi:10.1098/rsbl.2018.0649)
- 531    23.    Petrazzini MEM, Bertolucci C, Foà A. 2018 Quantity discrimination in Trained  
532        lizards (*Podarcis sicula*). *Front. Psychol.* **9**, 1–6. (doi:10.3389/fpsyg.2018.00274)
- 533    24.    Gómez-Laplaza LM, Díaz-Sotelo E, Gerlai R. 2018 Quantity discrimination in  
534        angelfish, *Pterophyllum scalare*: a novel approach with food as the discriminant.

- 535 *Anim. Behav.* **142**, 19–30. (doi:10.1016/j.anbehav.2018.06.001)
- 536 25. Potrich D, Rugani R, Sovrano VA, Regolin L, Vallortigara G. 2019 Use of  
537 numerical and spatial information in ordinal counting by zebrafish. *Sci. Rep.*  
538 **9:18323**. (doi:10.1038/s41598-019-54740-8)
- 539 26. Stancher G, Sovrano VA, Potrich D, Vallortigara G. 2013 Discrimination of small  
540 quantities by fish (redtail splitfin, *Xenotoca eiseni*). *Anim. Cogn.* **16**, 307–312.  
541 (doi:10.1007/s10071-012-0590-y)
- 542 27. Dacke M, Srinivasan M V. 2008 Evidence for counting in insects. *Anim. Cogn.* **11**,  
543 683–689. (doi:10.1007/s10071-008-0159-y)
- 544 28. Gross HJ, Pahl M, Si A, Zhu H, Tautz J, Zhang S. 2009 Number-based visual  
545 generalisation in the honeybee. *PLoS One* **4**, e4263.  
546 (doi:10.1371/journal.pone.0004263)
- 547 29. Nelson XJ, Jackson RR. 2012 The role of numerical competence in a specialized  
548 predatory strategy of an araneophagic spider. *Anim. Cogn.* **15**, 699–710.  
549 (doi:10.1007/s10071-012-0498-6)
- 550 30. Rodríguez RL, Briceño RD, Briceño-Aguilar E, Höbel G. 2015 *Nephila clavipes*  
551 spiders (Araneae: Nephilidae) keep track of captured prey counts: testing for a  
552 sense of numerosity in an orb-weaver. *Anim. Cogn.* **18**, 307–314.  
553 (doi:10.1007/s10071-014-0801-9)
- 554 31. Vallortigara G. 2017 An animal's sense of number. In *The nature and*  
555 *development of mathematics. Cross disciplinary perspective on cognition,*  
556 *learning and culture* (ed A Adams, J. W., Barmby, P. & Mesoudi), pp. 43–65.  
557 Routledge, New York.
- 558 32. Bortot M, Regolin L, Vallortigara G. 2021 A sense of number in invertebrates.  
559 *Biochem. Biophys. Res. Commun.* **564**, 37–42. (doi:10.1016/j.bbrc.2020.11.039)
- 560 33. Butterworth Brian. 1999 *The mathematical brain*. Macmillan. London.
- 561 34. Nieder A, Dehaene S. 2009 Representation of number in the brain. *Annu. Rev.*  
562 *Neurosci.* **32**, 185–208. (doi:10.1146/annurev.neuro.051508.135550)
- 563 35. Trick LM, Pylyshyn ZW. 1994 Why are small and large numbers enumerated  
564 differently? A limited-capacity preattentive stage in vision. *Psychol. Rev.* **101**, 80–  
565 102. (doi:10.1037/0033-295X.101.1.80)
- 566 36. Vallortigara G. 2014 Foundations of number and space representations in  
567 precocial species. In *Evolutionary origins and early development of number*  
568 *processing* (ed K Geary, D. C., Bearch, D. B. & Mann Koepke), pp. 35–66. New  
569 York: Elsevier.

- 570 37. Kutter EF, Bostroem J, Elger CE, Mormann F, Nieder A. 2018 Single Neurons in  
571 the Human Brain Encode Numbers. *Neuron* **100**, 753-761.e4.  
572 (doi:10.1016/j.neuron.2018.08.036)
- 573 38. Piazza M, Izard V, Pinel P, Le Bihan D, Dehaene S. 2004 Tuning curves for  
574 approximate numerosity in the human intraparietal sulcus. *Neuron* **44**, 547–555.  
575 (doi:10.1016/j.neuron.2004.10.014)
- 576 39. Nieder A, Freedman DJ, Miller EK. 2002 Representation of the quantity of visual  
577 items in the primate prefrontal cortex. *Science* **297**, 1708–1711.  
578 (doi:10.1126/science.1072493)
- 579 40. Nieder A, Merten K. 2007 A labeled-line code for small and large numerosities in  
580 the monkey prefrontal cortex. *J. Neurosci.* **27**, 5986–5993.  
581 (doi:10.1523/JNEUROSCI.1056-07.2007)
- 582 41. Ditz HM, Nieder A. 2015 Neurons selective to the number of visual items in the  
583 corvid songbird endbrain. *Proc. Natl. Acad. Sci. U. S. A.* **112**, 7827–7832.  
584 (doi:10.1073/pnas.1504245112)
- 585 42. Messina A, Potrich D, Schiona I, Sovrano VA, Fraser SE, Brennan CH,  
586 Vallortigara G. 2020 Response to change in the number of visual stimuli in  
587 zebrafish: A behavioural and molecular study. *Sci. Rep.* **10:5769**.  
588 (doi:10.1038/s41598-020-62608-5)
- 589 43. Messina A, Potrich D, Schiona I, Sovrano VA, Fraser SE, Brennan CH,  
590 Vallortigara G. 2021 Neurons in the Dorso-Central Division of Zebrafish Pallium  
591 Respond to Change in Visual Numerosity. *Cereb. Cortex* **00**, 1–11.  
592 (doi:10.1093/cercor/bhab218)
- 593 44. Nieder A. 2021 The Evolutionary History of Brains for Numbers. *Trends Cogn.*  
594 *Sci.* **25**, 608–621. (doi:10.1016/j.tics.2021.03.012)
- 595 45. Vallortigara G. 2021 *Born Knowing: Imprinting and the Origins of Knowledge*.  
596 Cambridge, Ma: MIT PRESS.
- 597 46. Leibovich T, Katzin N, Harel M, Henik A. 2017 From ‘sense of number’ to ‘sense  
598 of magnitude’: The role of continuous magnitudes in numerical cognition. *Behav.*  
599 *Brain Sci.* **40**. (doi:10.1017/S0140525X16000960)
- 600 47. Howard SR, Avarguès-Weber A, Garcia JE, Greentree AD, Dyer AG. 2018  
601 Numerical ordering of zero in honey bees. *Science* **360**, 1124–1126.  
602 (doi:10.1126/science.aar4975)
- 603 48. Maboudi H Di *et al.* 2021 Non-numerical strategies used by bees to solve  
604 numerical cognition tasks. *Proc. R. Soc. B Biol. Sci.* **288**, 20202711.  
605 (doi:10.1098/rspb.2020.2711)

- 606 49. Zanon M, Potrich D, Bortot M, Vallortigara G. 2021 Towards a standardization of  
607 non-symbolic numerical experiments: GeNEsIS, a flexible and user-friendly tool to  
608 generate controlled stimuli. *Behav. Res. Methods* (doi:10.3758/s13428-021-  
609 01580-y)
- 610 50. Newport C, Schuster S. 2020 Archerfish vision: Visual challenges faced by a  
611 predator with a unique hunting technique. *Semin. Cell Dev. Biol.* **106**, 53–60.  
612 (doi:10.1016/j.semcdb.2020.05.017)
- 613 51. Leibovich-Raveh T, Raveh A, Vilker D, Gabay S. 2021 Magnitude integration in  
614 the Archerfish. *Sci. Rep.* **11**, 1–11. (doi:10.1038/s41598-021-94956-1)
- 615 52. Karoubi N, Leibovich T, Segev R. 2017 Symbol-value association and  
616 discrimination in the archerfish. *PLoS One* **12**, 1–16.  
617 (doi:10.1371/journal.pone.0174044)
- 618 53. Newport C, Wallis G, Temple SE, Siebeck UE. 2013 Complex, context-dependent  
619 decision strategies of archerfish, *Toxotes chatareus*. *Anim. Behav.* **86**, 1265–  
620 1274. (doi:10.1016/j.anbehav.2013.09.031)
- 621 54. Ben-Simon A, Ben-Shahar O, Vasserman G, Ben-Tov M, Segev R. 2012 Visual  
622 acuity in the archerfish: Behavior, anatomy, and neurophysiology. *J. Vis.* **12**, 1–  
623 19. (doi:10.1167/12.12.18)
- 624 55. Miletto Petrazzini ME, Agrillo C, Izard V, Bisazza A. 2016 Do humans (*Homo*  
625 *sapiens*) and fish (*Pterophyllum scalare*) make similar numerosity judgments. *J.*  
626 *Comp. Psychol.* **130**, 380–390. (doi:10.1037/com0000045)
- 627 56. Miletto Petrazzini ME, Agrillo C, Izard V, Bisazza A. 2015 Relative versus  
628 absolute numerical representation in fish: Can guppies represent “fourness”?  
629 *Anim. Cogn.* **18**, 1007–1017. (doi:10.1007/s10071-015-0868-y)
- 630 57. Bortot M, Agrillo C, Avarguès-Weber A, Bisazza A, Petrazzini MEM, Giurfa M.  
631 2019 Honeybees use absolute rather than relative numerosity in number  
632 discrimination. *Biol. Lett.* **15**, 5–9. (doi:10.1098/rsbl.2019.0138)
- 633 58. Potrich D, Sovrano VA, Stancher G, Vallortigara G. 2015 Quantity discrimination  
634 by zebrafish (*Danio rerio*). *J. Comp. Psychol.* **129**, 388–393.  
635 (doi:10.1037/com0000012)
- 636 59. Adriano A, Girelli L, Rinaldi L. 2021 The ratio effect in visual numerosity  
637 comparisons is preserved despite spatial frequency equalisation. *Vision Res.* **183**,  
638 41–52. (doi:10.1016/j.visres.2021.01.011)
- 639 60. Felisatti A, Laubrock J, Shaki S, Fischer MH. 2020 A biological foundation for  
640 spatial-numerical associations: the brain’s asymmetric frequency tuning. *Ann. N.*  
641 *Y. Acad. Sci.* **1477**, 44–53. (doi:10.1111/nyas.14418)

- 642 61. Hyde DC. 2011 Two systems of non-symbolic numerical cognition. *Front. Hum.*  
643 *Neurosci.* **5**, 1–8. (doi:10.3389/fnhum.2011.00150)
- 644 62. Pepperberg IM, Brezinsky M V. 1991 Acquisition of a relative class concept by an  
645 African gray parrot (*Psittacus erithacus*): discriminations based on relative size. *J.*  
646 *Comp. Psychol.* **105**, 286–294. (doi:10.1037/0735-7036.105.3.286)
- 647 63. Pepperberg IM. 1994 Numerical competence in an African gray parrot (*Psittacus*  
648 *erithacus*). *J. Comp. Psychol.* **108**, 36–44. (doi:10.1037/0735-7036.108.1.36)
- 649 64. Smirnova AA, Lazareva OF, Zorina ZA. 2000 Use of Number By Crows:  
650 Investigation By Matching and Oddity Learning. *J. Exp. Anal. Behav.* **73**, 163–  
651 176. (doi:10.1901/jeab.2000.73-163)
